# Supplementary material
Source: publisher figshare collection journal article supplement (https://acs.figshare.com/ndownloader/files/4227535)
Supplement: Supplementary file 1 [file 4227535]

## Supporting Information

**Figure 1s.** Block-diagram of synthetic step-routes and resulting experimentally determined products established from initial reaction of  $\text{Pd}_{10}(\text{CO})_{12}(\text{PEt}_3)_6$  (**5**) with  $\text{Au}(\text{SMe}_2)\text{Cl}$ . Reaction conditions for different diagram-labeled steps and identified products are as follows: (a) Reaction under  $\text{N}_2$  in acetone/HOAc solution at  $50^\circ\text{C}$  for 2 h afforded a black precipitate (BP) along with filtrate A.  $^{31}\text{P}\{^1\text{H}\}$  NMR spectrum of BP in  $\text{C}_6\text{D}_6$  indicated its compositions to consist of  $\text{Pd}_{23}(\text{CO})_{20}(\text{PEt}_3)_{10}$  (**4**) (ca. 60%),  $\text{Au}_2\text{Pd}_{21}(\text{CO})_{20}(\text{PEt}_3)_{10}$  (**3**) (ca. 5%), and unidentified products with strong signals at  $\delta_1 = 8.1(\text{br})$ ,  $\delta_2 = -1.8$ ,  $\delta_3 = -3.2$ ,  $\delta_4 = -4.2$ ,  $\delta_5 = -4.3$  ppm.  $^{31}\text{P}\{^1\text{H}\}$  NMR spectrum of filtrate A showed the characteristic signal of  $\text{Pd}(\text{PEt}_3)_2\text{Cl}_2$  (17.1 ppm), traces of  $\text{Pd}_{34}(\text{CO})_{24}(\text{PEt}_3)_{12}$ ,<sup>26a,b</sup> and several non-assignable signals (in the range of  $\delta$  22.3 – 7.0 ppm) but provided no detectable evidence for the  $\text{Pd}_{10}$  reactant **5**,  $\text{Au}_2\text{Pd}_{21}$  **3**, or  $\text{Pd}_{16}(\text{CO})_{13}(\text{PEt}_3)_9$ ; (b) Room temperature extraction of BP with THF followed by crystallization under CO via vapor diffusion from hexane/acetone mixture (3/2 ratio) gave  $\text{Au}_2\text{Pd}_{28}(\text{CO})_{26}(\text{PEt}_3)_{10}$  (**1**) (20% based on Pd) and solution B; (c) Addition of heptane to concentrated solution B gave  $\text{Pd}_{10}$  **5** (8%). (d) Crystallization from entire filtrate A under CO via vapor diffusion from 95% EtOH gave  $\text{Au}_2\text{Pd}_{21}$  **3** (7%) and  $\text{Pd}_{10}$  **5** (17%). (e) Crystallization from entire filtrate A under CO without additional solvents gave only  $\text{Au}_2\text{Pd}_{21}$  **3** (4.7%). (f) Crystallization from entire filtrate A under  $\text{N}_2$  via vapor diffusion from 95% EtOH gave  $\text{Pd}_{16}(\text{CO})_{13}(\text{PEt}_3)_9$  (11%) and  $\text{Pd}_{34}(\text{CO})_{24}(\text{PEt}_3)_{12}$ ; (<1%). (g) Crystallization from solution A' under CO via vapor diffusion from 75% EtOH gave  $\text{Pd}_{10}$  **5** (6%). Most reactions also gave rise to Pd black.

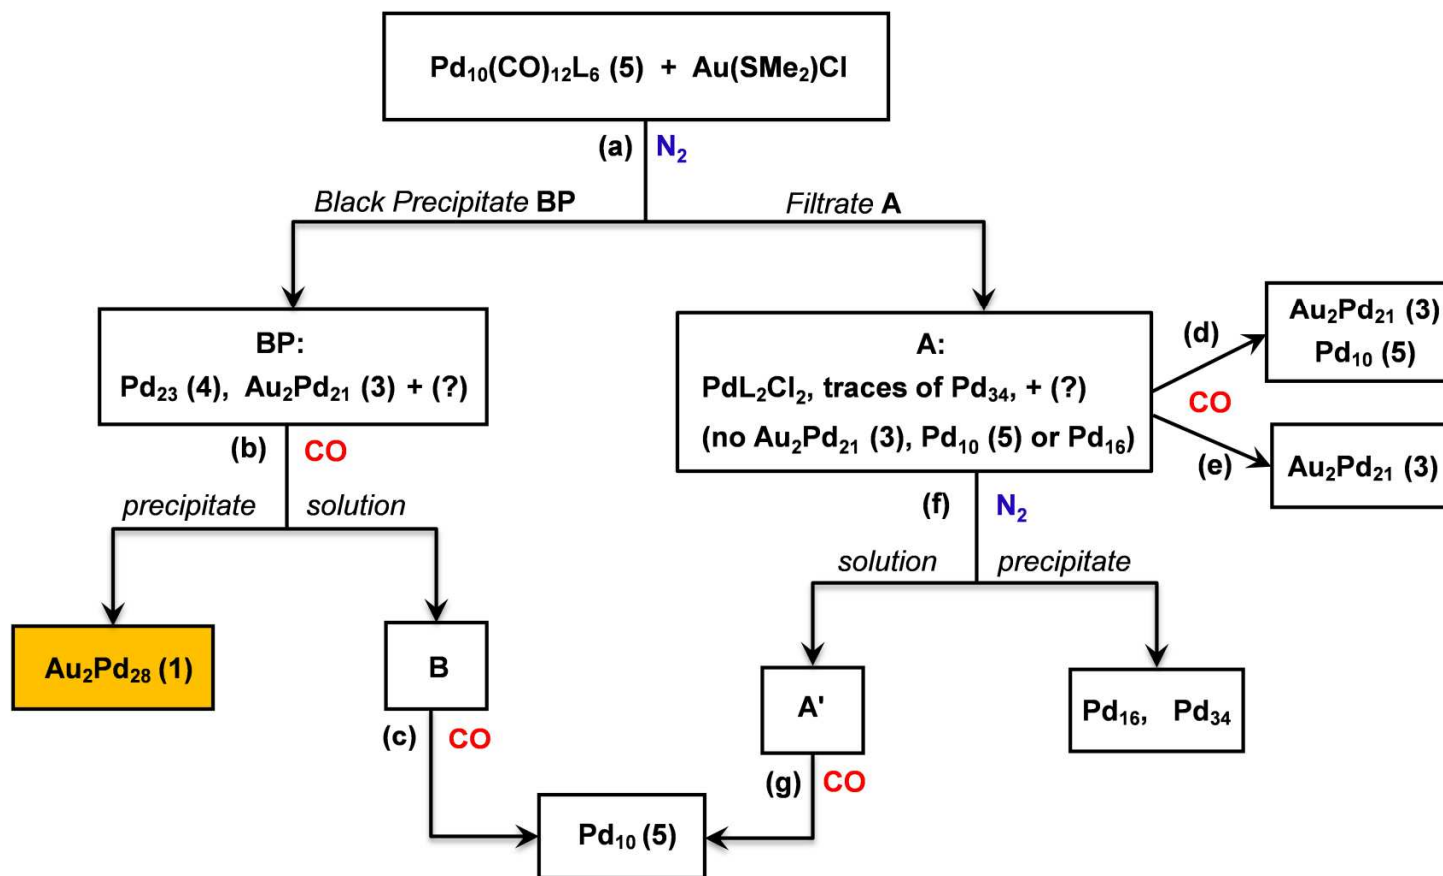

Figure 1s
